# Supplementary material
Source: PubMed Central journal article supplement (PMC9069341)
Supplement: jamacardiol-e220662-s001.pdf [file jamacardiol-e220662-s001.pdf]

## Supplemental Online Content

Wang Y, Leifheit EC, Krumholz HM. Trends in 10-year outcomes among Medicare beneficiaries who survived an acute myocardial infarction. *JAMA Cardiol*. Published online May 4, 2022. doi:10.1001/jamacardio.2022.0662

**eMethods.** Expanded patient characteristics

**eReferences.**

**eTable 1.** Clinical Classifications Software categories

**eTable 2.** Overall patient characteristics by race: unweighted and weighted

**eTable 3.** Overall patient characteristics by sex: unweighted and weighted

**eTable 4.** Overall patient characteristics by dual Medicare-Medicaid eligibility: unweighted and weighted

**eTable 5.** Overall patient characteristics by living in a health priority area: unweighted and weighted

**eTable 6.** Inverse probability weight–adjusted rates of 10-year mortality and recurrence by demographic subgroups and index hospitalization year for all patients eligible for 10 years of follow-up

**eTable 7.** Change in risk of 10-year mortality and recurrent AMI for patients hospitalized in 2007-2009 compared with 1995-1997 by demographic subgroups

**eTable 8.** Observed rates of 10-year mortality and recurrent AMI by index hospitalization year and STEMI diagnosis

**eTable 9.** Inverse probability weight–adjusted mortality rates for patients with and without a recurrent AMI by demographic subgroups

**eTable 10.** Observed rate of CABG or PCI during the index AMI hospitalization by year and demographic subgroups

**eTable 11.** Observed 10-year rate of CABG or PCI after the index AMI hospitalization by demographic subgroups

**eFigure 1.** Distribution of mean age by demographic subgroups: 1995-2019

**eFigure 2.** Adjusted hazard ratios for the associations of demographic subgroups with 10-year mortality and recurrent AMI

**eFigure 3.** Adjusted Kaplan-Meier curves for 10-year mortality and recurrence by demographic subgroups: 1995-2009

**eFigure 4.** Median days to death or recurrent AMI by index hospitalization year

**eFigure 5.** Observed Kaplan-Meier curves for 10-year mortality and recurrent AMI by STEMI diagnosis and index hospitalization year

This supplementary material has been provided by the authors to give readers additional information about their work.

## **eMethods.** Expanded patient characteristics

Patient baseline characteristics were based on information available at the time of discharge for the initial AMI and included 1) demographic information (age [continuous], sex, race [Asian, Black, Hispanic, North American Native, White, other race/ethnicity, or unreported], living in a health priority area [i.e., geographic area with persistently higher adjusted mortality and hospitalization rates],<sup>1</sup> living in an area where the median income was <25<sup>th</sup> percentile of the national average,<sup>2</sup> dual-eligible for Medicare and Medicaid); 2) clinical comorbidities included in the Centers for Medicare & Medicaid Services hospital 30-day mortality measures for AMI,<sup>3</sup> history of or current smoking, and admission information (from a skilled nursing/intermediate care facility, from an emergency department, emergent or urgent admission, anterior MI, inferior/lateral/posterior MI); 3) in-hospital care (in-hospital percutaneous coronary intervention or coronary artery bypass grafting, more than 1 in-hospital complications, length of stay [continuous], discharged to home, transferred to another acute-care hospital); and 4) characteristics of the admission hospital (rural,<sup>4</sup> teaching, private-not-for profit, CABG-capable). We used the Agency for Healthcare Research and Quality Clinical Classifications Software (CCS; eTable 1) to identify the in-hospital complications, including infections (CCS-2 to CCS-10, CCS-126, CCS-135, CCS-159), complications of devices (CCS-237) and surgical procedures/medical care (CCS-238), and superficial injury/contusion (CCS-239). Because the maximum number of diagnosis codes in Medicare data increased from 10 to 25 in 2011,<sup>5</sup> we restricted the 2011–2019 data to the first 10 diagnosis codes.

## eReferences.

1. Krumholz HM, Normand ST, Wang Y. Geographical health priority areas for older Americans. *Health Aff (Millwood)*. 2018;37(1):104-110.
2. Spatz ES, Beckman AL, Wang Y, Desai NR, Krumholz HM. Geographic variation in trends and disparities in acute myocardial infarction hospitalization and mortality by income levels, 1999-2013. *JAMA Cardiol*. 2016;1(3):255-265.
3. Krumholz HM, Wang Y, Mattera JA, et al. An administrative claims model suitable for profiling hospital performance based on 30-day mortality rates among patients with an acute myocardial infarction. *Circulation*. 2006;113(13):1683-1692.
4. Health Resources & Services Administration. Defining rural population. <https://www.hrsa.gov/rural-health/about-us/definition>. Accessed January 11, 2022.
5. Centers for Medicare & Medicaid Services. 5010 implementation—Processing additional International Classification of Diseases, 9th Revision-Clinical Modification (ICD-9-CM) diagnosis and procedure codes in Pricer, Grouper, and the Medicare Code Editor (MCE). Pub 100-04. <https://www.cms.gov/Regulations-and-Guidance/Guidance/Transmittals/downloads/R2028CP.pdf>. Accessed January 11, 2022.

**eTable 1. Clinical Classifications Software categories**

| <b>Clinical Classification Software ID</b> | <b>Disease category</b>                                |
|--------------------------------------------|--------------------------------------------------------|
| 1                                          | Tuberculosis                                           |
| 2                                          | Septicemia (except in labor)                           |
| 3                                          | Bacterial infection; unspecified site                  |
| 4                                          | Mycoses                                                |
| 5                                          | HIV infection                                          |
| 6                                          | Hepatitis                                              |
| 7                                          | Viral infection                                        |
| 8                                          | Other infections; including parasitic                  |
| 9                                          | Sexually transmitted infections (not HIV or hepatitis) |
| 10                                         | Immunizations and screening for infectious disease     |
| 11                                         | Cancer of head and neck                                |
| 12                                         | Cancer of esophagus                                    |
| 13                                         | Cancer of stomach                                      |
| 14                                         | Cancer of colon                                        |
| 15                                         | Cancer of rectum and anus                              |
| 16                                         | Cancer of liver and intrahepatic bile duct             |
| 17                                         | Cancer of pancreas                                     |
| 18                                         | Cancer of other GI organs; peritoneum                  |
| 19                                         | Cancer of bronchus; lung                               |
| 20                                         | Cancer; other respiratory and intrathoracic            |
| 21                                         | Cancer of bone and connective tissue                   |
| 22                                         | Melanomas of skin                                      |
| 23                                         | Other non-epithelial cancer of skin                    |
| 24                                         | Cancer of breast                                       |
| 25                                         | Cancer of uterus                                       |
| 26                                         | Cancer of cervix                                       |
| 27                                         | Cancer of ovary                                        |
| 28                                         | Cancer of other female genital organs                  |
| 29                                         | Cancer of prostate                                     |
| 30                                         | Cancer of testis                                       |
| 31                                         | Cancer of other male genital organs                    |
| 32                                         | Cancer of bladder                                      |
| 33                                         | Cancer of kidney and renal pelvis                      |
| 34                                         | Cancer of other urinary organs                         |
| 35                                         | Cancer of brain and nervous system                     |
| 36                                         | Cancer of thyroid                                      |
| 37                                         | Hodgkin's disease                                      |
| 38                                         | Non-Hodgkin's lymphoma                                 |
| 39                                         | Leukemias                                              |
| 40                                         | Multiple myeloma                                       |
| 41                                         | Cancer; other and unspecified primary                  |
| 42                                         | Secondary malignancies                                 |
| 43                                         | Malignant neoplasm without specification of site       |
| 44                                         | Neoplasms of unspecified nature or uncertain behavior  |
| 45                                         | Maintenance chemotherapy; radiotherapy                 |
| 46                                         | Benign neoplasm of uterus                              |
| 47                                         | Other and unspecified benign neoplasm                  |
| 48                                         | Thyroid disorders                                      |
| 49                                         | Diabetes mellitus without complication                 |
| 50                                         | Diabetes mellitus with complications                   |
| 51                                         | Other endocrine disorders                              |
| 52                                         | Nutritional deficiencies                               |

---

|     |                                                                                                                    |
|-----|--------------------------------------------------------------------------------------------------------------------|
| 53  | Disorders of lipid metabolism                                                                                      |
| 54  | Gout and other crystal arthropathies                                                                               |
| 55  | Fluid and electrolyte disorders                                                                                    |
| 56  | Cystic fibrosis                                                                                                    |
| 57  | Immunity disorders                                                                                                 |
| 58  | Other nutritional; endocrine; and metabolic disorders                                                              |
| 59  | Deficiency and other anemia                                                                                        |
| 60  | Acute posthemorrhagic anemia                                                                                       |
| 61  | Sickle cell anemia                                                                                                 |
| 62  | Coagulation and hemorrhagic disorders                                                                              |
| 63  | Diseases of white blood cells                                                                                      |
| 64  | Other hematologic conditions                                                                                       |
| 650 | Adjustment disorders                                                                                               |
| 651 | Anxiety disorders                                                                                                  |
| 652 | Attention-deficit, conduct, and disruptive behavior disorders                                                      |
| 653 | Delirium, dementia, and amnestic and other cognitive disorders                                                     |
| 654 | Developmental disorders                                                                                            |
| 655 | Disorders usually diagnosed in infancy, childhood, or adolescence                                                  |
| 656 | Impulse control disorders, NEC                                                                                     |
| 657 | Mood disorders                                                                                                     |
| 658 | Personality disorders                                                                                              |
| 659 | Schizophrenia and other psychotic disorders                                                                        |
| 660 | Alcohol-related disorders                                                                                          |
| 661 | Substance-related disorders                                                                                        |
| 662 | Suicide and intentional self-inflicted injury                                                                      |
| 663 | Screening and history of mental health and substance abuse codes                                                   |
| 670 | Miscellaneous disorders                                                                                            |
| 76  | Meningitis (except that caused by tuberculosis or sexually transmitted disease)                                    |
| 77  | Encephalitis (except that caused by tuberculosis or sexually transmitted disease)                                  |
| 78  | Other CNS infection and poliomyelitis                                                                              |
| 79  | Parkinson's disease                                                                                                |
| 80  | Multiple sclerosis                                                                                                 |
| 81  | Other hereditary and degenerative nervous system conditions                                                        |
| 82  | Paralysis                                                                                                          |
| 83  | Epilepsy; convulsions                                                                                              |
| 84  | Headache; including migraine                                                                                       |
| 85  | Coma; stupor; and brain damage                                                                                     |
| 86  | Cataract                                                                                                           |
| 87  | Retinal detachments; defects; vascular occlusion; and retinopathy                                                  |
| 88  | Glaucoma                                                                                                           |
| 89  | Blindness and vision defects                                                                                       |
| 90  | Inflammation; infection of eye (except that caused by tuberculosis or sexually transmitted disease)                |
| 91  | Other eye disorders                                                                                                |
| 92  | Otitis media and related conditions                                                                                |
| 93  | Conditions associated with dizziness or vertigo                                                                    |
| 94  | Other ear and sense organ disorders                                                                                |
| 95  | Other nervous system disorders                                                                                     |
| 96  | Heart valve disorders                                                                                              |
| 97  | Peri-; endo-; and myocarditis; cardiomyopathy (except that caused by tuberculosis or sexually transmitted disease) |
| 98  | Essential hypertension                                                                                             |
| 99  | Hypertension with complications and secondary hypertension                                                         |
| 100 | Acute myocardial infarction                                                                                        |

---

---

101 Coronary atherosclerosis and other heart disease  
102 Nonspecific chest pain  
103 Pulmonary heart disease  
104 Other and ill-defined heart disease  
105 Conduction disorders  
106 Cardiac dysrhythmias  
107 Cardiac arrest and ventricular fibrillation  
108 Congestive heart failure; nonhypertensive  
109 Acute cerebrovascular disease  
110 Occlusion or stenosis of precerebral arteries  
111 Other and ill-defined cerebrovascular disease  
112 Transient cerebral ischemia  
113 Late effects of cerebrovascular disease  
114 Peripheral and visceral atherosclerosis  
115 Aortic; peripheral; and visceral artery aneurysms  
116 Aortic and peripheral arterial embolism or thrombosis  
117 Other circulatory disease  
118 Phlebitis; thrombophlebitis and thromboembolism  
119 Varicose veins of lower extremity  
120 Hemorrhoids  
121 Other diseases of veins and lymphatics  
122 Pneumonia (except that caused by tuberculosis or sexually transmitted disease)  
123 Influenza  
124 Acute and chronic tonsillitis  
125 Acute bronchitis  
126 Other upper respiratory infections  
127 Chronic obstructive pulmonary disease and bronchiectasis  
128 Asthma  
129 Aspiration pneumonitis; food/vomitus  
130 Pleurisy; pneumothorax; pulmonary collapse  
131 Respiratory failure; insufficiency; arrest (adult)  
132 Lung disease due to external agents  
133 Other lower respiratory disease  
134 Other upper respiratory disease  
135 Intestinal infection  
136 Disorders of teeth and jaw  
137 Diseases of mouth; excluding dental  
138 Esophageal disorders  
139 Gastroduodenal ulcer (except hemorrhage)  
140 Gastritis and duodenitis  
141 Other disorders of stomach and duodenum  
142 Appendicitis and other appendiceal conditions  
143 Abdominal hernia  
144 Regional enteritis and ulcerative colitis  
145 Intestinal obstruction without hernia  
146 Diverticulosis and diverticulitis  
147 Anal and rectal conditions  
148 Peritonitis and intestinal abscess  
149 Biliary tract disease  
150 Liver disease; alcohol-related  
151 Other liver diseases  
152 Pancreatic disorders (not diabetes)  
153 Gastrointestinal hemorrhage  
154 Noninfectious gastroenteritis  
155 Other gastrointestinal disorders

---

---

|     |                                                                                                               |
|-----|---------------------------------------------------------------------------------------------------------------|
| 156 | Nephritis; nephrosis; renal sclerosis                                                                         |
| 157 | Acute and unspecified renal failure                                                                           |
| 158 | Chronic kidney disease                                                                                        |
| 159 | Urinary tract infections                                                                                      |
| 160 | Calculus of urinary tract                                                                                     |
| 161 | Other diseases of kidney and ureters                                                                          |
| 162 | Other diseases of bladder and urethra                                                                         |
| 163 | Genitourinary symptoms and ill-defined conditions                                                             |
| 164 | Hyperplasia of prostate                                                                                       |
| 165 | Inflammatory conditions of male genital organs                                                                |
| 166 | Other male genital disorders                                                                                  |
| 167 | Nonmalignant breast conditions                                                                                |
| 168 | Inflammatory diseases of female pelvic organs                                                                 |
| 169 | Endometriosis                                                                                                 |
| 170 | Prolapse of female genital organs                                                                             |
| 171 | Menstrual disorders                                                                                           |
| 172 | Ovarian cyst                                                                                                  |
| 173 | Menopausal disorders                                                                                          |
| 174 | Female infertility                                                                                            |
| 175 | Other female genital disorders                                                                                |
| 176 | Contraceptive and procreative management                                                                      |
| 177 | Spontaneous abortion                                                                                          |
| 178 | Induced abortion                                                                                              |
| 179 | Postabortion complications                                                                                    |
| 180 | Ectopic pregnancy                                                                                             |
| 181 | Other complications of pregnancy                                                                              |
| 182 | Hemorrhage during pregnancy; abruptio placenta; placenta previa                                               |
| 183 | Hypertension complicating pregnancy; childbirth and the puerperium                                            |
| 184 | Early or threatened labor                                                                                     |
| 185 | Prolonged pregnancy                                                                                           |
| 186 | Diabetes or abnormal glucose tolerance complicating pregnancy;<br>childbirth; or the puerperium               |
| 187 | Malposition; malpresentation                                                                                  |
| 188 | Fetopelvic disproportion; obstruction                                                                         |
| 189 | Previous C-section                                                                                            |
| 190 | Fetal distress and abnormal forces of labor                                                                   |
| 191 | Polyhydramnios and other problems of amniotic cavity                                                          |
| 192 | Umbilical cord complication                                                                                   |
| 193 | OB-related trauma to perineum and vulva                                                                       |
| 194 | Forceps delivery                                                                                              |
| 195 | Other complications of birth; puerperium affecting management of<br>mother                                    |
| 196 | Normal pregnancy and/or delivery                                                                              |
| 197 | Skin and subcutaneous tissue infections                                                                       |
| 198 | Other inflammatory condition of skin                                                                          |
| 199 | Chronic ulcer of skin                                                                                         |
| 200 | Other skin disorders                                                                                          |
| 201 | Infective arthritis and osteomyelitis (except that caused by tuberculosis<br>or sexually transmitted disease) |
| 202 | Rheumatoid arthritis and related disease                                                                      |
| 203 | Osteoarthritis                                                                                                |
| 204 | Other non-traumatic joint disorders                                                                           |
| 205 | Spondylosis; intervertebral disc disorders; other back problems                                               |
| 206 | Osteoporosis                                                                                                  |
| 207 | Pathological fracture                                                                                         |
| 208 | Acquired foot deformities                                                                                     |

---

---

|      |                                                                                       |
|------|---------------------------------------------------------------------------------------|
| 209  | Other acquired deformities                                                            |
| 210  | Systemic lupus erythematosus and connective tissue disorders                          |
| 211  | Other connective tissue disease                                                       |
| 212  | Other bone disease and musculoskeletal deformities                                    |
| 213  | Cardiac and circulatory congenital anomalies                                          |
| 214  | Digestive congenital anomalies                                                        |
| 215  | Genitourinary congenital anomalies                                                    |
| 216  | Nervous system congenital anomalies                                                   |
| 217  | Other congenital anomalies                                                            |
| 218  | Liveborn                                                                              |
| 219  | Short gestation; low birth weight; and fetal growth retardation                       |
| 220  | Intrauterine hypoxia and birth asphyxia                                               |
| 221  | Respiratory distress syndrome                                                         |
| 222  | Hemolytic jaundice and perinatal jaundice                                             |
| 223  | Birth trauma                                                                          |
| 224  | Other perinatal conditions                                                            |
| 225  | Joint disorders and dislocations; trauma-related                                      |
| 226  | Fracture of neck of femur (hip)                                                       |
| 227  | Spinal cord injury                                                                    |
| 228  | Skull and face fractures                                                              |
| 229  | Fracture of upper limb                                                                |
| 230  | Fracture of lower limb                                                                |
| 231  | Other fractures                                                                       |
| 232  | Sprains and strains                                                                   |
| 233  | Intracranial injury                                                                   |
| 234  | Crushing injury or internal injury                                                    |
| 235  | Open wounds of head; neck; and trunk                                                  |
| 236  | Open wounds of extremities                                                            |
| 237  | Complication of device; implant or graft                                              |
| 238  | Complications of surgical procedures or medical care                                  |
| 239  | Superficial injury; contusion                                                         |
| 240  | Burns                                                                                 |
| 241  | Poisoning by psychotropic agents                                                      |
| 242  | Poisoning by other medications and drugs                                              |
| 243  | Poisoning by nonmedicinal substances                                                  |
| 244  | Other injuries and conditions due to external causes                                  |
| 245  | Syncope                                                                               |
| 246  | Fever of unknown origin                                                               |
| 247  | Lymphadenitis                                                                         |
| 248  | Gangrene                                                                              |
| 249  | Shock                                                                                 |
| 250  | Nausea and vomiting                                                                   |
| 251  | Abdominal pain                                                                        |
| 252  | Malaise and fatigue                                                                   |
| 253  | Allergic reactions                                                                    |
| 254  | Rehabilitation care; fitting of prostheses; and adjustment of devices                 |
| 255  | Administrative/social admission                                                       |
| 256  | Medical examination/evaluation                                                        |
| 257  | Other aftercare                                                                       |
| 258  | Other screening for suspected conditions (not mental disorders or infectious disease) |
| 259  | Residual codes; unclassified                                                          |
| 260  | E Codes: All (external causes of injury and poisoning)                                |
| 2601 | E Codes: Cut/pierce                                                                   |
| 2602 | E Codes: Drowning/submersion                                                          |
| 2603 | E Codes: Fall                                                                         |

---



---

|      |                                           |
|------|-------------------------------------------|
| 2604 | E Codes: Fire/burn                        |
| 2605 | E Codes: Firearm                          |
| 2606 | E Codes: Machinery                        |
| 2607 | E Codes: Motor vehicle traffic (MVT)      |
| 2608 | E Codes: Pedal cyclist; not MVT           |
| 2609 | E Codes: Pedestrian; not MVT              |
| 2610 | E Codes: Transport; not MVT               |
| 2611 | E Codes: Natural/environment              |
| 2612 | E Codes: Overexertion                     |
| 2613 | E Codes: Poisoning                        |
| 2614 | E Codes: Struck by; against               |
| 2615 | E Codes: Suffocation                      |
| 2616 | E Codes: Adverse effects of medical care  |
| 2617 | E Codes: Adverse effects of medical drugs |
| 2618 | E Codes: Other specified and classifiable |
| 2619 | E Codes: Other specified; NEC             |
| 2620 | E Codes: Unspecified                      |
| 2621 | E Codes: Place of occurrence              |

---

**eTable 2.** Overall patient characteristics by race: unweighted and weighted

| Characteristics, n (%)                                              | Unweighted    |                    |                | Inverse Probability Weighted |                    |                |
|---------------------------------------------------------------------|---------------|--------------------|----------------|------------------------------|--------------------|----------------|
|                                                                     | Black         | Other <sup>a</sup> | White          | Black                        | Other <sup>a</sup> | White          |
| No. of patients                                                     | 280525        | 181912             | 3519829        | 275146                       | 195750             | 3521548        |
| Age, mean (standard deviation), y                                   | 77.2 (7.5)    | 77.2 (7.4)         | 78.1 (7.4)     | 77.9 (7.5)                   | 77.8 (7.4)         | 77.9 (7.4)     |
| Female                                                              | 162865 (58.1) | 86259 (47.4)       | 1703326 (48.4) | 132214 (48.1)                | 100933 (51.6)      | 1727020 (49.0) |
| Dual Medicare-Medicaid-eligible                                     | 109120 (38.9) | 81693 (44.9)       | 433006 (12.3)  | 45395 (16.5)                 | 26255 (13.4)       | 553423 (15.7)  |
| Not enrolled in Part B                                              | 8878 (3.2)    | 8289 (4.6)         | 71182 (2.0)    | 6287 (2.3)                   | 4335 (2.2)         | 78217 (2.2)    |
| Living in a health priority area                                    | 75616 (27.0)  | 20071 (11.0)       | 740447 (21.0)  | 60996 (22.2)                 | 51699 (26.4)       | 741219 (21.0)  |
| Living in an area with income <25th percentile of national average  | 44057 (15.7)  | 20110 (11.1)       | 323751 (9.2)   | 29822 (10.8)                 | 22571 (11.5)       | 344921 (9.8)   |
| Admitted from a skilled nursing facility/intermediate care facility | 3613 (1.3)    | 1511 (0.8)         | 32528 (0.9)    | 2722 (1.0)                   | 2071 (1.1)         | 33346 (0.9)    |
| Admitted from an emergency department                               | 214371 (76.4) | 135821 (74.7)      | 2493674 (70.8) | 195757 (71.1)                | 135512 (69.2)      | 2514577 (71.4) |
| Emergent or urgent admission                                        | 259101 (92.4) | 168060 (92.4)      | 3230235 (91.8) | 252624 (91.8)                | 176998 (90.4)      | 3234050 (91.8) |
| Anterior MI                                                         | 27442 (9.8)   | 22189 (12.2)       | 442307 (12.6)  | 33577 (12.2)                 | 24076 (12.3)       | 434718 (12.3)  |
| Inferior/lateral/posterior MI                                       | 34839 (12.4)  | 27459 (15.1)       | 635096 (18.0)  | 47165 (17.1)                 | 34281 (17.5)       | 616274 (17.5)  |
| Prior heart failure                                                 | 51344 (18.3)  | 22360 (12.3)       | 381009 (10.8)  | 33683 (12.2)                 | 23791 (12.2)       | 403723 (11.5)  |
| Prior myocardial infarction                                         | 7351 (2.6)    | 4014 (2.2)         | 72540 (2.1)    | 5406 (2.0)                   | 4217 (2.2)         | 75541 (2.1)    |
| Unstable angina                                                     | 11140 (4.0)   | 6904 (3.8)         | 119946 (3.4)   | 10046 (3.7)                  | 7217 (3.7)         | 122187 (3.5)   |
| Atherosclerotic disease                                             | 172386 (61.5) | 119190 (65.5)      | 2397383 (68.1) | 185037 (67.3)                | 130806 (66.8)      | 2377076 (67.5) |
| Respiratory failure                                                 | 12180 (4.3)   | 6328 (3.5)         | 103340 (2.9)   | 9201 (3.3)                   | 6071 (3.1)         | 108147 (3.1)   |
| Hypertension                                                        | 156832 (55.9) | 97027 (53.3)       | 1876582 (53.3) | 149433 (54.3)                | 103674 (53.0)      | 1884150 (53.5) |
| Prior stroke                                                        | 8208 (2.9)    | 3456 (1.9)         | 54999 (1.6)    | 4820 (1.8)                   | 3410 (1.7)         | 59205 (1.7)    |
| Cerebral vascular disease other than stroke                         | 17599 (6.3)   | 7827 (4.3)         | 158866 (4.5)   | 12741 (4.6)                  | 9595 (4.9)         | 163076 (4.6)   |
| Renal failure                                                       | 75343 (26.9)  | 36881 (20.3)       | 495864 (14.1)  | 43649 (15.9)                 | 28124 (14.4)       | 539321 (15.3)  |
| Chronic obstructive pulmonary disease                               | 52513 (18.7)  | 29603 (16.3)       | 730116 (20.7)  | 60789 (22.1)                 | 44375 (22.7)       | 719481 (20.4)  |
| Pneumonia                                                           | 35992 (12.8)  | 24026 (13.2)       | 388280 (11.0)  | 33212 (12.1)                 | 22329 (11.4)       | 397221 (11.3)  |
| Protein-calorie malnutrition                                        | 14496 (5.2)   | 6495 (3.6)         | 89731 (2.5)    | 8085 (2.9)                   | 5503 (2.8)         | 98384 (2.8)    |
| Dementia                                                            | 35135 (12.5)  | 14817 (8.1)        | 279322 (7.9)   | 23507 (8.5)                  | 17340 (8.9)        | 291827 (8.3)   |
| Functional disability                                               | 11932 (4.3)   | 4247 (2.3)         | 53676 (1.5)    | 5021 (1.8)                   | 3520 (1.8)         | 62262 (1.8)    |
| Peripheral vascular disease                                         | 28103 (10.0)  | 12020 (6.6)        | 233585 (6.6)   | 19489 (7.1)                  | 14051 (7.2)        | 242436 (6.9)   |
| Cancer                                                              | 16928 (6.0)   | 7763 (4.3)         | 175682 (5.0)   | 14306 (5.2)                  | 10094 (5.2)        | 177245 (5.0)   |
| Trauma in past year                                                 | 10325 (3.7)   | 8437 (4.6)         | 176616 (5.0)   | 14124 (5.1)                  | 10238 (5.2)        | 172852 (4.9)   |
| Other major psychiatric disorder                                    | 5786 (2.1)    | 3083 (1.7)         | 57841 (1.6)    | 4911 (1.8)                   | 4000 (2.0)         | 59208 (1.7)    |
| Liver disease                                                       | 6779 (2.4)    | 5067 (2.8)         | 61316 (1.7)    | 5355 (1.9)                   | 3457 (1.8)         | 64822 (1.8)    |
| Depression                                                          | 8720 (3.1)    | 6343 (3.5)         | 169515 (4.8)   | 12859 (4.7)                  | 10610 (5.4)        | 163279 (4.6)   |

|                                     |               |              |                |              |              |                |
|-------------------------------------|---------------|--------------|----------------|--------------|--------------|----------------|
| Diabetes                            | 123573 (44.1) | 78855 (43.3) | 1050082 (29.8) | 90671 (33.0) | 60648 (31.0) | 1110243 (31.5) |
| Asthma                              | 9581 (3.4)    | 6367 (3.5)   | 76972 (2.2)    | 6310 (2.3)   | 4233 (2.2)   | 82129 (2.3)    |
| Anemias                             | 80923 (28.8)  | 43776 (24.1) | 692889 (19.7)  | 57276 (20.8) | 39249 (20.1) | 723695 (20.6)  |
| Parkinson's or Huntington's disease | 2556 (0.9)    | 2360 (1.3)   | 50562 (1.4)    | 4060 (1.5)   | 2840 (1.5)   | 49083 (1.4)    |

<sup>a</sup>Other race includes Asian, Hispanic, North American Native, all other racial and ethnic groups, and unreported.

**eTable 3.** Overall patient characteristics by sex: unweighted and weighted

| Characteristics, n (%)                                              | Unweighted     |                |        | Inverse Probability Weighted |                |        |
|---------------------------------------------------------------------|----------------|----------------|--------|------------------------------|----------------|--------|
|                                                                     | Female         | Male           | SMD    | Female                       | Male           | SMD    |
| No. of patients                                                     | 1952450        | 2029816        |        | 1959313                      | 2029964        |        |
| Age, mean (standard deviation), y                                   | 79.4 (7.6)     | 76.6 (6.9)     | 0.386  | 77.9 (7.6)                   | 77.9 (6.9)     | -0.002 |
| Black                                                               | 162865 (8.3)   | 117660 (5.8)   | 0.099  | 139035 (7.1)                 | 146870 (7.2)   | -0.005 |
| Other race <sup>a</sup>                                             | 86259 (4.4)    | 95653 (4.7)    | -0.014 | 91405 (4.7)                  | 98514 (4.9)    | -0.009 |
| White                                                               | 1703326 (87.2) | 1816503 (89.5) | -0.07  | 1728873 (88.2)               | 1784580 (87.9) | 0.01   |
| Dual Medicare-Medicaid-eligible                                     | 411776 (21.1)  | 212043 (10.4)  | 0.295  | 306569 (15.6)                | 328342 (16.2)  | -0.014 |
| Not enrolled in Part B                                              | 24423 (1.3)    | 63926 (3.1)    | -0.13  | 44371 (2.3)                  | 45372 (2.2)    | 0.002  |
| Living in a health priority area                                    | 414513 (21.2)  | 421621 (20.8)  | 0.011  | 409457 (20.9)                | 423017 (20.8)  | 0.002  |
| Living in an area with income <25th percentile of national average  | 191797 (9.8)   | 196121 (9.7)   | 0.005  | 190724 (9.7)                 | 198312 (9.8)   | -0.001 |
| Admitted from a skilled nursing facility/intermediate care facility | 24761 (1.3)    | 12891 (0.6)    | 0.065  | 18626 (1.0)                  | 19968 (1.0)    | -0.003 |
| Admitted from an emergency department                               | 1382850 (70.8) | 1461016 (72.0) | -0.026 | 1400264 (71.5)               | 1458593 (71.9) | -0.009 |
| Emergent or urgent admission                                        | 1755370 (89.9) | 1902026 (93.7) | -0.139 | 1799368 (91.8)               | 1860245 (91.6) | 0.007  |
| Anterior MI                                                         | 242226 (12.4)  | 249712 (12.3)  | 0.003  | 240404 (12.3)                | 248193 (12.2)  | 0.001  |
| Inferior/lateral/posterior MI                                       | 316700 (16.2)  | 380694 (18.8)  | -0.067 | 343524 (17.5)                | 353512 (17.4)  | 0.003  |
| Prior heart failure                                                 | 255244 (13.1)  | 199469 (9.8)   | 0.102  | 223927 (11.4)                | 231654 (11.4)  | 0.001  |
| Prior myocardial infarction                                         | 43366 (2.2)    | 40539 (2.0)    | 0.016  | 39605 (2.0)                  | 44426 (2.2)    | -0.012 |
| Unstable angina                                                     | 68192 (3.5)    | 69798 (3.4)    | 0.003  | 67665 (3.5)                  | 69552 (3.4)    | 0.002  |
| Atherosclerotic disease                                             | 1214270 (62.2) | 1474689 (72.7) | -0.225 | 1322688 (67.5)               | 1366482 (67.3) | 0.004  |
| Respiratory failure                                                 | 66828 (3.4)    | 55020 (2.7)    | 0.041  | 60982 (3.1)                  | 63755 (3.1)    | -0.002 |
| Hypertension                                                        | 1122482 (57.5) | 1007959 (49.7) | 0.158  | 1040544 (53.1)               | 1079733 (53.2) | -0.002 |
| Prior stroke                                                        | 36728 (1.9)    | 29935 (1.5)    | 0.032  | 33086 (1.7)                  | 34433 (1.7)    | -0.001 |
| Cerebral vascular disease other than stroke                         | 98185 (5.0)    | 86107 (4.2)    | 0.037  | 91491 (4.7)                  | 95030 (4.7)    | -0.001 |
| Renal failure                                                       | 275026 (14.1)  | 333062 (16.4)  | -0.065 | 301413 (15.4)                | 313896 (15.5)  | -0.002 |
| Chronic obstructive pulmonary disease                               | 381125 (19.5)  | 431107 (21.2)  | -0.043 | 412222 (21.0)                | 425574 (21.0)  | 0.002  |
| Pneumonia                                                           | 230675 (11.8)  | 217623 (10.7)  | 0.035  | 223846 (11.4)                | 233346 (11.5)  | -0.002 |
| Protein-calorie malnutrition                                        | 63738 (3.3)    | 46984 (2.3)    | 0.058  | 55383 (2.8)                  | 59118 (2.9)    | -0.005 |
| Dementia                                                            | 203779 (10.4)  | 125495 (6.2)   | 0.155  | 161755 (8.3)                 | 170585 (8.4)   | -0.005 |
| Functional disability                                               | 35318 (1.8)    | 34537 (1.7)    | 0.008  | 34797 (1.8)                  | 36219 (1.8)    | -0.001 |
| Peripheral vascular disease                                         | 138743 (7.1)   | 134965 (6.6)   | 0.018  | 136019 (6.9)                 | 141548 (7.0)   | -0.001 |
| Cancer                                                              | 80746 (4.1)    | 119627 (5.9)   | -0.081 | 101474 (5.2)                 | 104038 (5.1)   | 0.002  |
| Trauma in past year                                                 | 119315 (6.1)   | 76063 (3.7)    | 0.109  | 95962 (4.9)                  | 101313 (5.0)   | -0.004 |
| Other major psychiatric disorder                                    | 40621 (2.1)    | 26089 (1.3)    | 0.062  | 33377 (1.7)                  | 36179 (1.8)    | -0.006 |
| Liver disease                                                       | 35914 (1.8)    | 37248 (1.8)    | 0      | 36497 (1.9)                  | 38019 (1.9)    | -0.001 |
| Depression                                                          | 122557 (6.3)   | 62021 (3.1)    | 0.153  | 91328 (4.7)                  | 97346 (4.8)    | -0.006 |
| Diabetes                                                            | 622006 (31.9)  | 630504 (31.1)  | 0.017  | 616117 (31.4)                | 636726 (31.4)  | 0.002  |

|                                     |               |               |        |               |               |        |
|-------------------------------------|---------------|---------------|--------|---------------|---------------|--------|
| Asthma                              | 60482 (3.1)   | 32438 (1.6)   | 0.099  | 45604 (2.3)   | 47473 (2.3)   | -0.001 |
| Anemias                             | 451590 (23.1) | 365998 (18.0) | 0.126  | 404335 (20.6) | 422701 (20.8) | -0.005 |
| Parkinson's or Huntington's disease | 23402 (1.2)   | 32076 (1.6)   | -0.033 | 27458 (1.4)   | 28509 (1.4)   | 0      |

Abbreviations: SMD, standardized mean difference.

<sup>a</sup>Other race includes Asian, Hispanic, North American Native, all other racial and ethnic groups, and unreported.

**eTable 4.** Overall patient characteristics by dual Medicare-Medicaid eligibility: unweighted and weighted

| Characteristics, n (%)                                              | Unweighted    |                   |        | Inverse Probability Weighted |                   |        |
|---------------------------------------------------------------------|---------------|-------------------|--------|------------------------------|-------------------|--------|
|                                                                     | Dual-eligible | Non-dual-eligible | SMD    | Dual-eligible                | Non-dual-eligible | SMD    |
| No. of patients                                                     | 623819        | 3358447           |        | 617842                       | 3369596           |        |
| Age, mean (standard deviation), y                                   | 78.2 (7.8)    | 77.9 (7.4)        | 0.045  | 77.9 (7.8)                   | 78.0 (7.4)        | -0.002 |
| Female                                                              | 411776 (66.0) | 1540674 (45.9)    | 0.414  | 304779 (49.3)                | 1657141 (49.2)    | 0.003  |
| Black                                                               | 109120 (17.5) | 171405 (5.1)      | 0.399  | 44391 (7.2)                  | 240612 (7.1)      | 0.002  |
| Other race <sup>a</sup>                                             | 81693 (13.1)  | 100219 (3.0)      | 0.379  | 28864 (4.7)                  | 160476 (4.8)      | -0.004 |
| White                                                               | 433006 (69.4) | 3086823 (91.9)    | -0.594 | 544586 (88.1)                | 2968508 (88.1)    | 0.001  |
| Not enrolled in Part B                                              | 54 (0.0)      | 88295 (2.6)       | -0.231 | 22653 (3.7)                  | 74509 (2.2)       | 0.086  |
| Living in a health priority area                                    | 157514 (25.2) | 678620 (20.2)     | 0.121  | 128232 (20.8)                | 710534 (21.1)     | -0.008 |
| Living in an area with income <25th percentile of national average  | 105711 (16.9) | 282207 (8.4)      | 0.259  | 62425 (10.1)                 | 332815 (9.9)      | 0.008  |
| Admitted from a skilled nursing facility/intermediate care facility | 13800 (2.2)   | 23852 (0.7)       | 0.125  | 6286 (1.0)                   | 33288 (1.0)       | 0.003  |
| Admitted from an emergency department                               | 438758 (70.3) | 2405108 (71.6)    | -0.028 | 437619 (70.8)                | 2403847 (71.3)    | -0.011 |
| Emergent or urgent admission                                        | 561586 (90.0) | 3095810 (92.2)    | -0.076 | 566759 (91.7)                | 3093322 (91.8)    | -0.003 |
| Anterior MI                                                         | 67559 (10.8)  | 424379 (12.6)     | -0.056 | 76643 (12.4)                 | 415545 (12.3)     | 0.002  |
| Inferior/lateral/posterior MI                                       | 84085 (13.5)  | 613309 (18.3)     | -0.131 | 106465 (17.2)                | 588682 (17.5)     | -0.006 |
| Prior heart failure                                                 | 113490 (18.2) | 341223 (10.2)     | 0.232  | 73936 (12.0)                 | 389881 (11.6)     | 0.012  |
| Prior myocardial infarction                                         | 17974 (2.9)   | 65931 (2.0)       | 0.06   | 12655 (2.0)                  | 72545 (2.2)       | -0.007 |
| Unstable angina                                                     | 27161 (4.4)   | 110829 (3.3)      | 0.055  | 21057 (3.4)                  | 117557 (3.5)      | -0.004 |
| Atherosclerotic disease                                             | 389010 (62.4) | 2299949 (68.5)    | -0.129 | 411242 (66.6)                | 2272336 (67.4)    | -0.019 |
| Respiratory failure                                                 | 31916 (5.1)   | 89932 (2.7)       | 0.126  | 20606 (3.3)                  | 104916 (3.1)      | 0.013  |
| Hypertension                                                        | 338422 (54.3) | 1792019 (53.4)    | 0.018  | 328959 (53.2)                | 1801771 (53.5)    | -0.005 |
| Prior stroke                                                        | 15527 (2.5)   | 51136 (1.5)       | 0.069  | 11640 (1.9)                  | 57438 (1.7)       | 0.014  |
| Cerebral vascular disease other than stroke                         | 39737 (6.4)   | 144555 (4.3)      | 0.092  | 30640 (5.0)                  | 157784 (4.7)      | 0.013  |
| Renal failure                                                       | 130054 (20.8) | 478034 (14.2)     | 0.175  | 95976 (15.5)                 | 517911 (15.4)     | 0.005  |
| Chronic obstructive pulmonary disease                               | 173429 (27.8) | 638803 (19.0)     | 0.209  | 131196 (21.2)                | 692941 (20.6)     | 0.017  |
| Pneumonia                                                           | 104224 (16.7) | 344074 (10.2)     | 0.19   | 74176 (12.0)                 | 383412 (11.4)     | 0.02   |
| Protein-calorie malnutrition                                        | 29997 (4.8)   | 80725 (2.4)       | 0.129  | 18933 (3.1)                  | 95755 (2.8)       | 0.013  |
| Dementia                                                            | 89483 (14.3)  | 239791 (7.1)      | 0.234  | 53550 (8.7)                  | 283062 (8.4)      | 0.01   |
| Functional disability                                               | 21673 (3.5)   | 48182 (1.4)       | 0.132  | 12308 (2.0)                  | 60938 (1.8)       | 0.013  |
| Peripheral vascular disease                                         | 60914 (9.8)   | 212794 (6.3)      | 0.126  | 44685 (7.2)                  | 233864 (6.9)      | 0.011  |
| Cancer                                                              | 30010 (4.8)   | 170363 (5.1)      | -0.012 | 30989 (5.0)                  | 169647 (5.0)      | -0.001 |
| Trauma in past year                                                 | 38758 (6.2)   | 156620 (4.7)      | 0.068  | 31529 (5.1)                  | 166659 (4.9)      | 0.007  |
| Other major psychiatric disorder                                    | 21848 (3.5)   | 44862 (1.3)       | 0.141  | 11956 (1.9)                  | 58815 (1.7)       | 0.014  |
| Liver disease                                                       | 16617 (2.7)   | 56545 (1.7)       | 0.067  | 11566 (1.9)                  | 62420 (1.9)       | 0.001  |
| Depression                                                          | 40654 (6.5)   | 143924 (4.3)      | 0.099  | 30336 (4.9)                  | 158073 (4.7)      | 0.01   |
| Diabetes                                                            | 254917 (40.9) | 997593 (29.7)     | 0.235  | 196969 (31.9)                | 1064317 (31.6)    | 0.006  |

|                                     |               |               |       |               |               |        |
|-------------------------------------|---------------|---------------|-------|---------------|---------------|--------|
| Asthma                              | 18514 (3.0)   | 74406 (2.2)   | 0.047 | 13944 (2.3)   | 78854 (2.3)   | -0.006 |
| Anemias                             | 163008 (26.1) | 654580 (19.5) | 0.159 | 127497 (20.6) | 694800 (20.6) | 0      |
| Parkinson's or Huntington's disease | 11118 (1.8)   | 44360 (1.3)   | 0.037 | 8618 (1.4)    | 47268 (1.4)   | -0.001 |

Abbreviations: SMD, standardized mean difference.

<sup>a</sup>Other race includes Asian, Hispanic, North American Native, all other racial and ethnic groups, and unreported.

**eTable 5.** Overall patient characteristics by living in a health priority area: unweighted and weighted

| Characteristics, n (%)                                              | Unweighted       |                      |        | Inverse Probability Weighted |                      |        |
|---------------------------------------------------------------------|------------------|----------------------|--------|------------------------------|----------------------|--------|
|                                                                     | In priority area | Not in priority area | SMD    | In priority area             | Not in priority area | SMD    |
| No. of patients                                                     | 836134           | 3146132              |        | 836342                       | 3146848              |        |
| Age, mean (standard deviation), y                                   | 77.3 (7.3)       | 78.1 (7.4)           | -0.12  | 77.9 (7.3)                   | 78.0 (7.4)           | -0.004 |
| Female                                                              | 414513 (49.6)    | 1537937 (48.9)       | 0.014  | 410109 (49.0)                | 1543050 (49.0)       | 0      |
| Black                                                               | 75616 (9.0)      | 204909 (6.5)         | 0.095  | 62877 (7.5)                  | 227080 (7.2)         | 0.012  |
| Other race <sup>a</sup>                                             | 20071 (2.4)      | 161841 (5.1)         | -0.144 | 40043 (4.8)                  | 143909 (4.6)         | 0.01   |
| White                                                               | 740447 (88.6)    | 2779382 (88.3)       | 0.007  | 733422 (87.7)                | 2775859 (88.2)       | -0.016 |
| Dual Medicare-Medicaid-eligible                                     | 157514 (18.8)    | 466305 (14.8)        | 0.108  | 129007 (15.4)                | 493491 (15.7)        | -0.007 |
| Not enrolled in Part B                                              | 15179 (1.8)      | 73170 (2.3)          | -0.036 | 18618 (2.2)                  | 69829 (2.2)          | 0.001  |
| Living in an area with income <25th percentile of national average  | 185861 (22.2)    | 202057 (6.4)         | 0.463  | 81265 (9.7)                  | 307310 (9.8)         | -0.002 |
| Admitted from a skilled nursing facility/intermediate care facility | 5350 (0.6)       | 32302 (1.0)          | -0.043 | 7717 (0.9)                   | 29661 (0.9)          | -0.002 |
| Admitted from an emergency department                               | 574751 (68.7)    | 2269115 (72.1)       | -0.074 | 598539 (71.6)                | 2248431 (71.5)       | 0.003  |
| Emergent or urgent admission                                        | 745928 (89.2)    | 2911468 (92.5)       | -0.116 | 766956 (91.7)                | 2888761 (91.8)       | -0.004 |
| Anterior MI                                                         | 100589 (12.0)    | 391349 (12.4)        | -0.013 | 103664 (12.4)                | 389027 (12.4)        | 0.001  |
| Inferior/lateral/posterior MI                                       | 145534 (17.4)    | 551860 (17.5)        | -0.004 | 147073 (17.6)                | 551495 (17.5)        | 0.002  |
| Prior heart failure                                                 | 99436 (11.9)     | 355277 (11.3)        | 0.019  | 95084 (11.4)                 | 359148 (11.4)        | -0.001 |
| Prior myocardial infarction                                         | 17354 (2.1)      | 66551 (2.1)          | -0.003 | 16503 (2.0)                  | 67138 (2.1)          | -0.011 |
| Unstable angina                                                     | 29184 (3.5)      | 108806 (3.5)         | 0.002  | 28541 (3.4)                  | 108844 (3.5)         | -0.003 |
| Atherosclerotic disease                                             | 576802 (69.0)    | 2112157 (67.1)       | 0.04   | 565895 (67.7)                | 2125359 (67.5)       | 0.003  |
| Respiratory failure                                                 | 27950 (3.3)      | 93898 (3.0)          | 0.021  | 25521 (3.1)                  | 96239 (3.1)          | 0      |
| Hypertension                                                        | 455958 (54.5)    | 1674483 (53.2)       | 0.026  | 446397 (53.4)                | 1683142 (53.5)       | -0.002 |
| Prior stroke                                                        | 14971 (1.8)      | 51692 (1.6)          | 0.011  | 13966 (1.7)                  | 52696 (1.7)          | 0      |
| Cerebral vascular disease other than stroke                         | 41662 (5.0)      | 142630 (4.5)         | 0.021  | 38650 (4.6)                  | 145643 (4.6)         | 0      |
| Renal failure                                                       | 126778 (15.2)    | 481310 (15.3)        | -0.004 | 128256 (15.3)                | 480925 (15.3)        | 0.002  |
| Chronic obstructive pulmonary disease                               | 187845 (22.5)    | 624387 (19.8)        | 0.064  | 168207 (20.1)                | 640072 (20.3)        | -0.006 |
| Pneumonia                                                           | 101301 (12.1)    | 346997 (11.0)        | 0.034  | 93532 (11.2)                 | 353884 (11.2)        | -0.002 |
| Protein-calorie malnutrition                                        | 25584 (3.1)      | 85138 (2.7)          | 0.021  | 23485 (2.8)                  | 87771 (2.8)          | 0.001  |
| Dementia                                                            | 71142 (8.5)      | 258132 (8.2)         | 0.011  | 68806 (8.2)                  | 260225 (8.3)         | -0.002 |
| Functional disability                                               | 14788 (1.8)      | 55067 (1.8)          | 0.001  | 14751 (1.8)                  | 55343 (1.8)          | 0      |
| Peripheral vascular disease                                         | 59740 (7.1)      | 213968 (6.8)         | 0.014  | 57478 (6.9)                  | 216294 (6.9)         | 0      |
| Cancer                                                              | 38651 (4.6)      | 161722 (5.1)         | -0.024 | 41986 (5.0)                  | 158242 (5.0)         | 0      |
| Trauma in past year                                                 | 38930 (4.7)      | 156448 (5.0)         | -0.015 | 40727 (4.9)                  | 154161 (4.9)         | -0.001 |
| Other major psychiatric disorder                                    | 13751 (1.6)      | 52959 (1.7)          | -0.003 | 14089 (1.7)                  | 52743 (1.7)          | 0.001  |
| Liver disease                                                       | 15399 (1.8)      | 57763 (1.8)          | 0      | 15394 (1.8)                  | 57848 (1.8)          | 0      |
| Depression                                                          | 39019 (4.7)      | 145559 (4.6)         | 0.002  | 38523 (4.6)                  | 145571 (4.6)         | -0.001 |



|                                     |               |               |        |               |               |        |
|-------------------------------------|---------------|---------------|--------|---------------|---------------|--------|
| Diabetes                            | 268445 (32.1) | 984065 (31.3) | 0.018  | 263151 (31.5) | 990047 (31.5) | 0      |
| Asthma                              | 16713 (2.0)   | 76207 (2.4)   | -0.029 | 19507 (2.3)   | 73424 (2.3)   | 0      |
| Anemias                             | 169713 (20.3) | 647875 (20.6) | -0.007 | 171643 (20.5) | 645983 (20.5) | 0      |
| Parkinson's or Huntington's disease | 11450 (1.4)   | 44028 (1.4)   | -0.003 | 11558 (1.4)   | 43792 (1.4)   | -0.001 |

Abbreviations: SMD, standardized mean difference.

<sup>a</sup>Other race includes Asian, Hispanic, North American Native, all other racial and ethnic groups, and unreported.

**eTable 6.** Inverse probability weight–adjusted rates of 10-year mortality and recurrence by demographic subgroups and index hospitalization year for all patients eligible for 10 years of follow-up

| Subgroup, % (95% CI)                                                                                    | Mortality        |                  |                  | Recurrent AMI    |                  |                  |
|---------------------------------------------------------------------------------------------------------|------------------|------------------|------------------|------------------|------------------|------------------|
|                                                                                                         | 1995–1999        | 2000–2004        | 2005–2009        | 1995–1999        | 2000–2004        | 2005–2009        |
| Female                                                                                                  | 70.8 (70.7-71.0) | 71.5 (71.3-71.6) | 72.1 (72.0-72.3) | 30.9 (30.7-31.1) | 27.3 (27.1-27.5) | 24.9 (24.7-25.1) |
| Male                                                                                                    | 75.0 (74.9-75.2) | 75.0 (74.9-75.2) | 75.1 (74.9-75.2) | 31.9 (31.7-32.1) | 29.0 (28.8-29.2) | 26.3 (26.0-26.5) |
| Black                                                                                                   | 76.1 (75.7-76.4) | 75.4 (75.0-75.7) | 74.6 (74.2-74.9) | 32.5 (31.6-33.3) | 29.9 (29.3-30.5) | 28.6 (27.9-29.2) |
| Other race (Asian, Hispanic, North American Native, all other racial and ethnic groups, and unreported) | 74.1 (73.6-74.6) | 71.3 (70.9-71.7) | 70.0 (69.5-70.4) | 32.1 (31.5-32.8) | 27.9 (27.3-28.6) | 24.6 (23.9-25.3) |
| White                                                                                                   | 73.2 (73.1-73.3) | 73.4 (73.3-73.5) | 74.0 (73.9-74.1) | 31.6 (31.4-31.7) | 28.0 (27.8-28.1) | 25.3 (25.2-25.5) |
| Dual Medicare-Medicaid-eligible                                                                         | 80.9 (80.6-81.1) | 80.2 (80.0-80.4) | 79.2 (79.0-79.5) | 36.0 (35.6-36.5) | 32.4 (32.0-32.8) | 29.0 (28.6-29.5) |
| Non-dual-eligible                                                                                       | 72.5 (72.4-72.6) | 72.5 (72.4-72.6) | 72.8 (72.7-72.9) | 31.2 (31.0-31.3) | 27.7 (27.5-27.8) | 25.0 (24.8-25.2) |
| Health priority area                                                                                    | 75.2 (75.0-75.4) | 74.9 (74.7-75.1) | 75.0 (74.8-75.2) | 31.7 (31.4-32.0) | 28.2 (27.9-28.5) | 25.8 (25.4-26.1) |
| Non-priority area                                                                                       | 72.6 (72.5-72.7) | 72.8 (72.7-72.9) | 73.1 (73.0-73.2) | 31.3 (31.2-31.5) | 27.9 (27.7-28.0) | 25.3 (25.1-25.5) |

Abbreviations: AMI, acute myocardial infarction; CI, confidence interval.

**eTable 7.** Change in risk of 10-year mortality and recurrent AMI for patients hospitalized in 2007-2009 compared with 1995-1997 by demographic subgroups

| Subgroup                                                                                                | IPW-adjusted Hazard Ratio (95% CI) |                  |
|---------------------------------------------------------------------------------------------------------|------------------------------------|------------------|
|                                                                                                         | Mortality                          | Recurrent AMI    |
| Age 65–79 years                                                                                         | 0.86 (0.86-0.87)                   | 0.74 (0.73-0.76) |
| Age 80 years or older                                                                                   | 0.86 (0.85-0.87)                   | 0.81 (0.80-0.83) |
| Female                                                                                                  | 0.88 (0.87-0.89)                   | 0.76 (0.75-0.78) |
| Male                                                                                                    | 0.86 (0.86-0.87)                   | 0.79 (0.78-0.81) |
| Black                                                                                                   | 0.81 (0.80-0.83)                   | 0.89 (0.85-0.94) |
| Other race (Asian, Hispanic, North American Native, all other racial and ethnic groups, and unreported) | 0.78 (0.76-0.81)                   | 0.73 (0.68-0.78) |
| White                                                                                                   | 0.87 (0.86-0.87)                   | 0.77 (0.76-0.78) |
| Dual Medicare-Medicaid-eligible                                                                         | 0.85 (0.84-0.86)                   | 0.82 (0.79-0.85) |
| Non-dual-eligible                                                                                       | 0.86 (0.85-0.86)                   | 0.76 (0.75-0.77) |
| Health priority area                                                                                    | 0.89 (0.88-0.90)                   | 0.77 (0.75-0.80) |
| Non-priority area                                                                                       | 0.86 (0.85-0.86)                   | 0.77 (0.76-0.79) |

Abbreviations: AMI, acute myocardial infarction; CI, confidence interval; IPW, inverse probability weight.

**eTable 8.** Observed rates of 10-year mortality and recurrent AMI by index hospitalization year and STEMI diagnosis

| <b>Outcome, % (95% CI)</b> | <b>STEMI or NSTEMI</b> | <b>1995–1999</b> | <b>2000–2004</b> | <b>2005–2009</b> | <b>2010–2014</b> | <b>2015–2019</b> |
|----------------------------|------------------------|------------------|------------------|------------------|------------------|------------------|
| 10-year Recurrent AMI      | NSTEMI                 | 31.3 (31.1-31.4) | 27.7 (27.5-27.8) | 25.3 (25.1-25.4) | 24.2 (24.0-24.5) | 15.5 (15.2-15.7) |
| 10-year Recurrent AMI      | STEMI                  | 34.9 (34.2-35.6) | 32.5 (31.9-33.1) | 27.0 (26.2-27.7) | 23.1 (21.4-24.7) | 12.4 (11.4-13.5) |
| 10-year Mortality          | NSTEMI                 | 72.1 (72.0-72.2) | 72.4 (72.3-72.5) | 73.0 (72.9-73.1) | 71.4 (71.2-71.6) | 44.6 (44.4-44.9) |
| 10-year Mortality          | STEMI                  | 83.1 (82.8-83.3) | 80.9 (80.6-81.1) | 79.1 (78.7-79.5) | 74.3 (73.3-75.2) | 42.9 (41.7-44.2) |

Abbreviations: AMI, acute myocardial infarction; CI, confidence interval; NSTEMI, non-ST-segment elevation myocardial infarction; STEMI, ST-segment elevation myocardial infarction.

**eTable 9.** Inverse probability weight–adjusted mortality rates for patients with and without a recurrent AMI by demographic subgroups

| <b>Subgroup, % (95% CI)</b>                                                                             | <b>Recurrence-free</b> | <b>Recurrence</b> |
|---------------------------------------------------------------------------------------------------------|------------------------|-------------------|
| Age 65–79 years                                                                                         | 59.6 (59.5-59.7)       | 71.6 (71.3-71.8)  |
| Age 80 years or older                                                                                   | 89.3 (89.2-89.4)       | 92.8 (92.7-93.0)  |
| Female                                                                                                  | 69.5 (69.4-69.6)       | 79.5 (79.3-79.7)  |
| Male                                                                                                    | 73.2 (73.1-73.3)       | 81.8 (81.6-82.0)  |
| Black                                                                                                   | 75.8 (75.4-76.1)       | 82.9 (82.3-83.6)  |
| Other race (Asian, Hispanic, North American Native, all other racial and ethnic groups, and unreported) | 66.3 (65.9-66.8)       | 79.5 (78.6-80.4)  |
| White                                                                                                   | 69.1 (69.0-69.2)       | 78.8 (78.6-79.0)  |
| Dual Medicare-Medicaid-eligible                                                                         | 78.5 (78.4-78.6)       | 85.0 (84.7-85.2)  |
| Non-dual-eligible                                                                                       | 70.7 (70.6-70.7)       | 80.1 (79.9-80.2)  |
| Health priority area                                                                                    | 73.2 (73.1-73.3)       | 82.1 (81.9-82.3)  |
| Non-priority area                                                                                       | 71.0 (70.9-71.0)       | 80.1 (80.0-80.3)  |

Abbreviations: CI, confidence interval.

**eTable 10.** Observed rate of CABG or PCI during the index AMI hospitalization by year and demographic subgroups

| <b>Subgroup, % (95% CI)</b>                                                                             | <b>1995–1999</b> | <b>2000–2004</b> | <b>2005–2009</b> | <b>2010–2014</b> | <b>2015–2019</b> |
|---------------------------------------------------------------------------------------------------------|------------------|------------------|------------------|------------------|------------------|
| Age 65–79 years                                                                                         | 28.5 (28.4-28.6) | 40.2 (40.1-40.4) | 52.0 (51.8-52.1) | 57.8 (57.7-58)   | 47.8 (47.7-48.0) |
| Age 80 years or older                                                                                   | 11.7 (11.6-11.9) | 19.9 (19.8-20.0) | 28.0 (27.8-28.1) | 33.0 (32.8-33.2) | 29.6 (29.4-29.8) |
| Female                                                                                                  | 19.0 (18.9-19.1) | 26.9 (26.8-27.0) | 34.9 (34.8-35.1) | 39.6 (39.4-39.8) | 34.9 (34.7-35.1) |
| Male                                                                                                    | 25.7 (25.6-25.9) | 36.9 (36.8-37.1) | 48.0 (47.9-48.2) | 54.6 (54.4-54.8) | 46.2 (46.0-46.3) |
| Black                                                                                                   | 15.9 (15.6-16.2) | 23.2 (22.9-23.5) | 29.9 (29.5-30.3) | 36.3 (35.9-36.7) | 32.1 (31.7-32.5) |
| Other race (Asian, Hispanic, North American Native, all other racial and ethnic groups, and unreported) | 20.9 (20.5-21.4) | 28.7 (28.3-29.1) | 39.0 (38.5-39.5) | 45.5 (44.9-46.0) | 40.4 (40.0-40.9) |
| White                                                                                                   | 22.9 (22.8-22.9) | 32.7 (32.6-32.8) | 42.6 (42.4-42.7) | 48.5 (48.4-48.6) | 41.9 (41.8-42.1) |
| Dual Medicare-Medicaid-eligible                                                                         | 13.8 (13.7-14.0) | 21.6 (21.4-21.8) | 29.8 (29.6-30.1) | 36.2 (35.9-36.5) | 31.9 (31.6-32.2) |
| Non-dual-eligible                                                                                       | 23.7 (23.6-23.8) | 33.8 (33.7-33.9) | 43.8 (43.7-43.9) | 49.7 (49.6-49.8) | 42.7 (42.6-42.9) |
| Health priority area                                                                                    | 24.3 (24.2-24.5) | 33.6 (33.4-33.8) | 42.9 (42.7-43.2) | 49.1 (48.8-49.4) | 42.4 (42.2-42.7) |
| Non-priority area                                                                                       | 21.8 (21.8-21.9) | 31.4 (31.3-31.5) | 41.1 (41.0-41.2) | 46.9 (46.8-47.0) | 40.8 (40.6-40.9) |

Abbreviations: CI, confidence interval.

**eTable 11.** Observed 10-year rate of CABG or PCI after the index AMI hospitalization by demographic subgroups

| <b>Subgroup</b>                                                                                         | <b>% (95% CI)</b> |
|---------------------------------------------------------------------------------------------------------|-------------------|
| Age 65–79 years                                                                                         | 20.9 (20.8-21.0)  |
| Age 80 years or older                                                                                   | 9.41 (9.34-9.48)  |
| Female                                                                                                  | 13.6 (13.5-13.7)  |
| Male                                                                                                    | 19.9 (19.8-20.0)  |
| Black                                                                                                   | 13.1 (12.9-13.3)  |
| Other race (Asian, Hispanic, North American Native, all other racial and ethnic groups, and unreported) | 15.9 (15.7-16.2)  |
| White                                                                                                   | 16.9 (16.9-17.0)  |
| Dual Medicare-Medicaid-eligible                                                                         | 13.8 (13.6-13.9)  |
| Non-dual-eligible                                                                                       | 17.1 (17.0-17.2)  |
| Health priority area                                                                                    | 16.9 (16.8-17.1)  |
| Non-priority area                                                                                       | 16.5 (16.4-16.5)  |

Abbreviations: CI, confidence interval.

**eFigure 1.** Distribution of mean age by demographic subgroups: 1995-2019

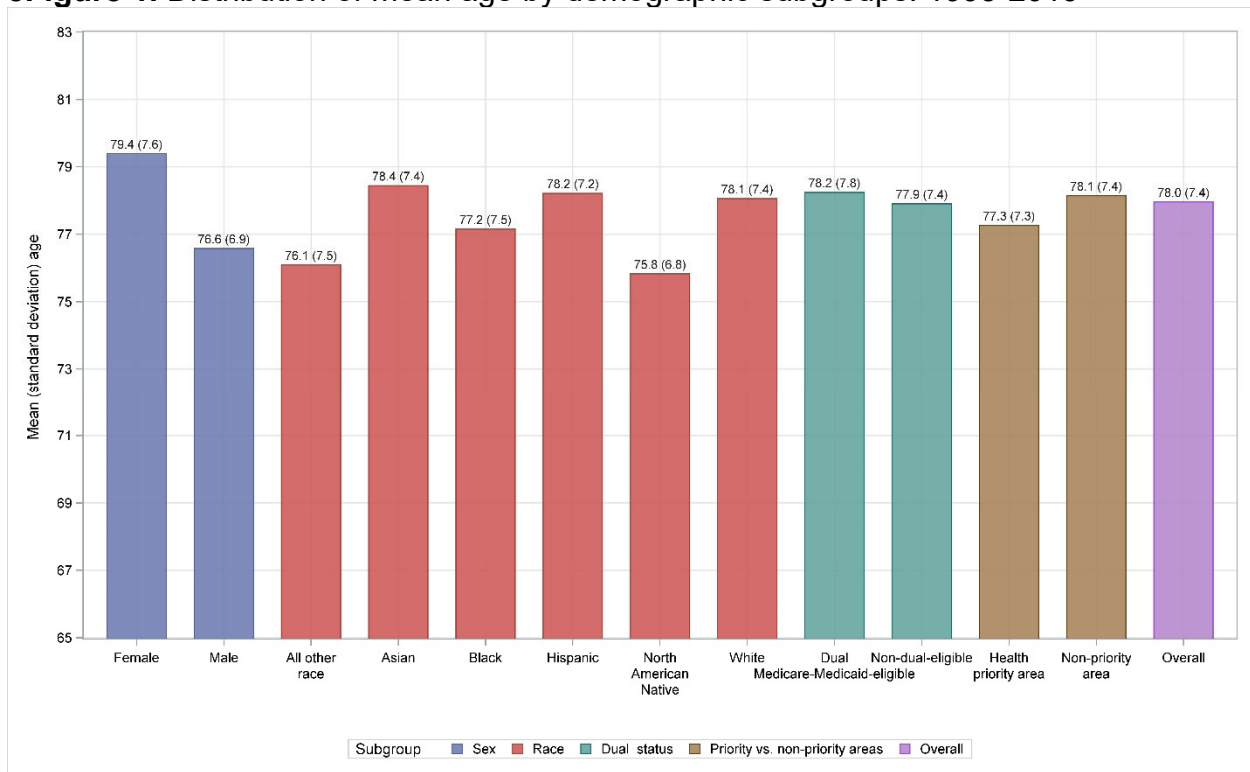



**eFigure 2.** Adjusted hazard ratios for the associations of demographic subgroups with 10-year mortality and recurrent AMI

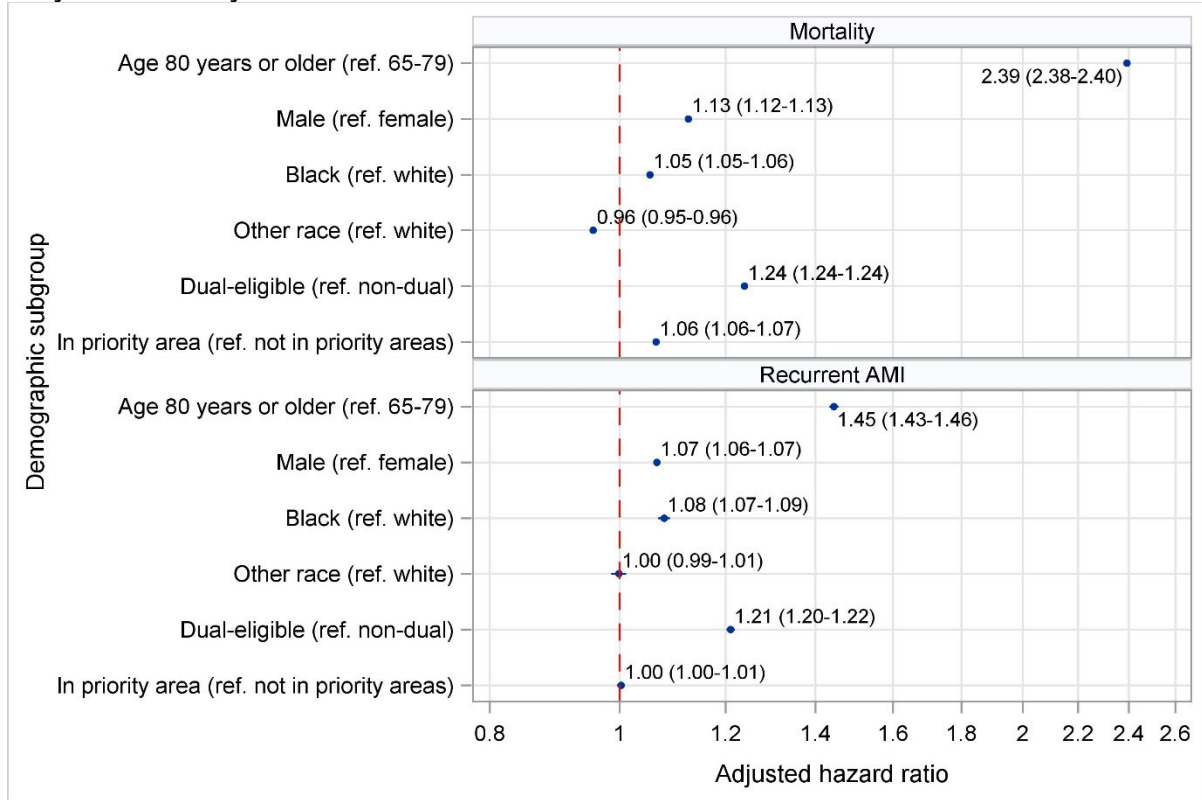

The forest plots summarize the adjusted hazard ratios and 95% confidence intervals for subgroup comparisons of 10-year mortality (top panel) and recurrent acute myocardial infarction (bottom panel). Other race includes Asian, Hispanic, North American Native, all other racial and ethnic groups, and unreported. Abbreviations: AMI, acute myocardial infarction.

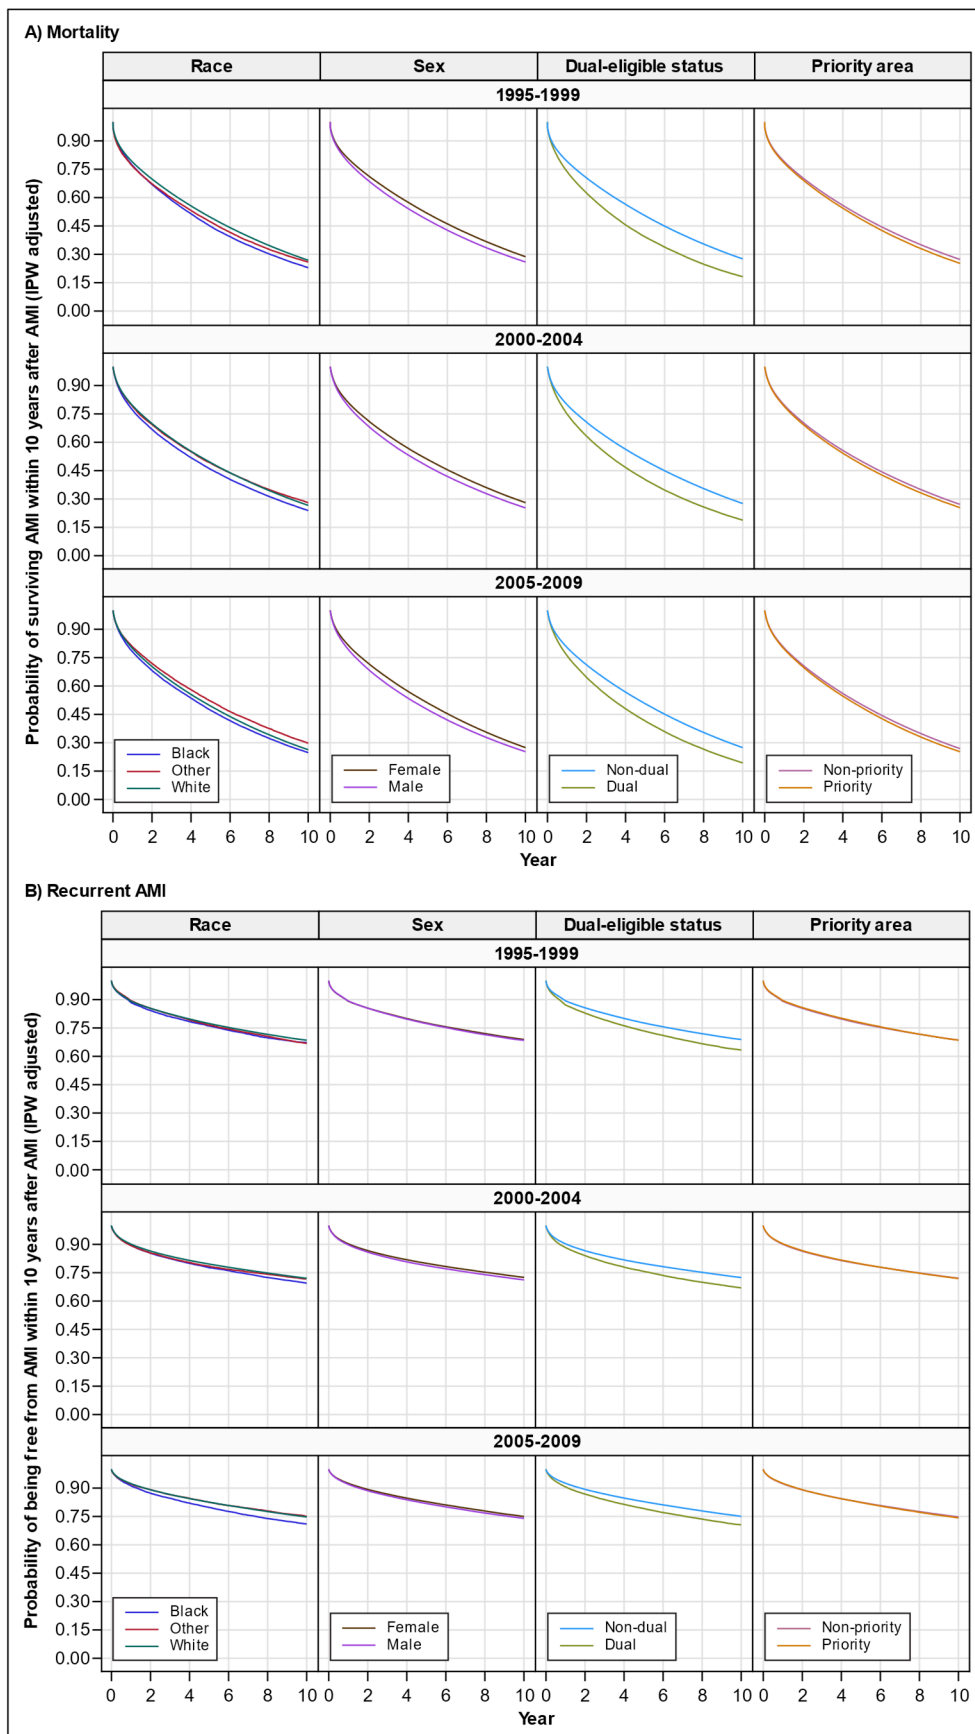

**eFigure 3.** Adjusted Kaplan-Meier curves for 10-year mortality and recurrence by demographic subgroups: 1995-2009

The inverse probability weight-adjusted Kaplan-Meier curves compare the probability of survival (top panel) and being free from recurrence (bottom panel) within 10 years after an initial acute myocardial infarction hospitalization for subgroups defined by race (Black, White, other race [Asian, Hispanic, North American Native, all other racial and ethnic groups, and unreported]), sex (male, female), dual Medicare-Medicaid eligibility (yes, no), and living in a health priority area (yes, no). Abbreviations: AMI, acute myocardial infarction; IPW, inverse probability weight.

**eFigure 4. Median days to death or recurrent AMI by index hospitalization year**

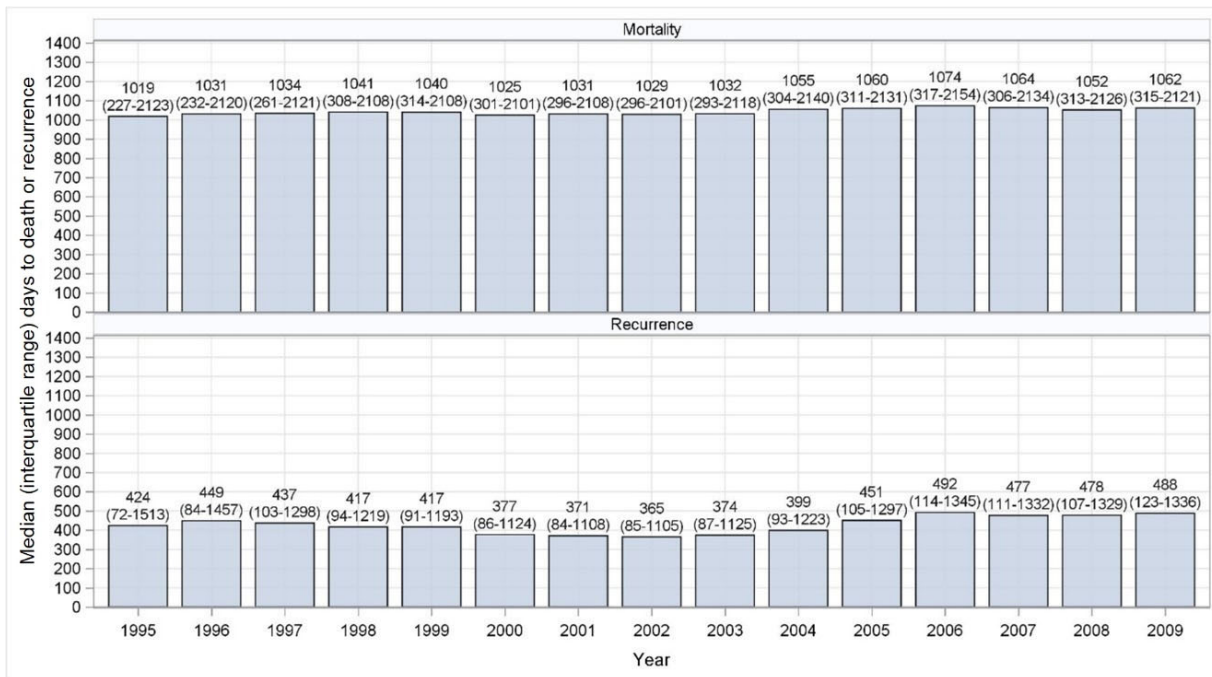

Data are for patients initially hospitalized with acute myocardial infarction from 1995 to 2009 (i.e., patients with the potential for a full 10 years of follow-up). The histograms display the median days to death among patients who died within 10 years (top panel) and the median days to a recurrent acute myocardial infarction among patients who had a recurrence within 10 years (bottom panel) by index hospitalization year.

**eFigure 5.** Observed Kaplan-Meier curves for 10-year mortality and recurrent AMI by STEMI diagnosis and index hospitalization year

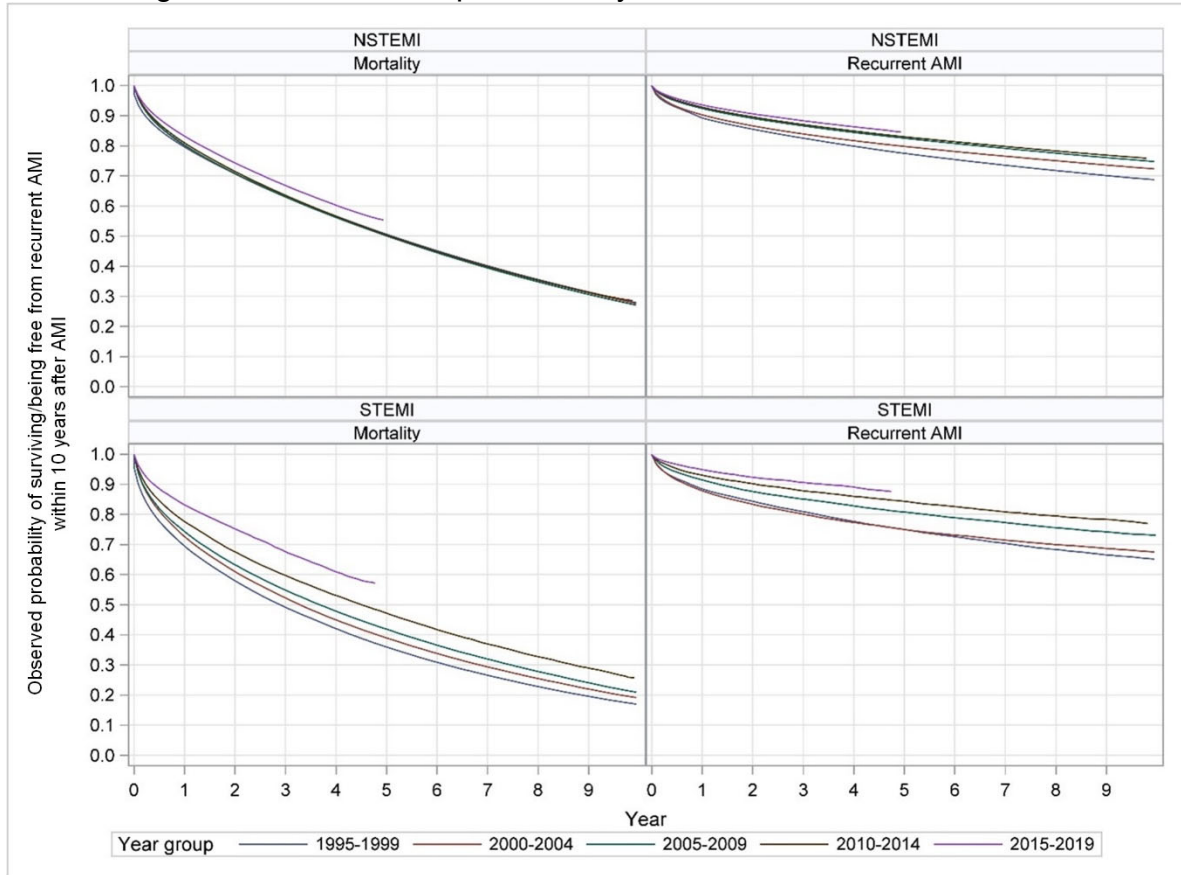

The Kaplan-Meier curves compare the probability of survival (left panel) and being free from recurrence (right panel) within 10 years after an initial acute myocardial infarction hospitalization by index hospitalization year (1995–1999, 2000–2004, 2005–2009, 2010–2014, and 2015–2019) and diagnosis (STEMI, NSTEMI). Abbreviations: AMI, acute myocardial infarction; NSTEMI, non-ST-segment elevation myocardial infarction; STEMI, ST-segment elevation myocardial infarction.
